# Supplementary material for: Lactobacillus rhamnosus GG ameliorates deoxynivalenol-induced kidney oxidative damage and mitochondrial injury in weaned piglets
Source: Royal Society of Chemistry journal article supplement (doi:10.1039/d2fo00185c), 2022-01-01
Supplement: d2fo00185c1.pdf [file d2fo00185c1.pdf]

***Lactobacillus rhamnosus* GG ameliorates deoxynivalenol-induced kidney  
oxidative damage and mitochondrial injury in weaned piglets**

Kaidi Ma<sup>a#</sup>, Yongsong Bai<sup>a#</sup>, Jibo Li<sup>a</sup>, Zhongshuai Ren<sup>b</sup>, Jianping Li<sup>a</sup>, Jing Zhang<sup>b\*\*</sup>, Anshan

Shan<sup>a\*</sup>

Table S1 Ingredient and nutritional level of diets (as-fed basis)

| Ingredients (%)            |       | Nutritional levels <sup>b</sup> (%) |       |
|----------------------------|-------|-------------------------------------|-------|
| Corn                       | 63.30 | Net energy (kcal/kg)                | 2565  |
| Full-fat expanded soybean  | 9.00  | Crude protein (CP)                  | 18.24 |
| Peeled soybean meal        | 13.00 | Lysine                              | 1.44  |
| Whey powder                | 5.00  | Methionine                          | 0.42  |
| Fish meal                  | 4.00  | Threonine                           | 0.89  |
| Soybean oil                | 2.00  | Calcium                             | 0.74  |
| Lysine (98%)               | 0.60  | Total phosphorus                    | 0.60  |
| Methionine (98%)           | 0.10  | Available phosphorus                | 0.33  |
| Threonine (98%)            | 0.20  |                                     |       |
| Calcium hydrogen phosphate | 0.70  |                                     |       |
| Limestone                  | 0.70  |                                     |       |
| Salt                       | 0.40  |                                     |       |
| Premix <sup>a</sup> (1%)   | 1.00  |                                     |       |

<sup>a</sup> Premix provided the following per kilogram of diet: Cu, 20.2 mg; Zn, 106.5 mg; Se, 0.3 mg; Mn, 3 mg; Fe, 120 mg; I, 0.2 mg; vitamin A, 5000 IU; vitamin D<sub>3</sub>, 1250 IU; vitamin E, 47.5 IU; vitamin K, 2.2 mg; vitamin B<sub>1</sub>, 3.6 mg; vitamin B<sub>2</sub>, 8.0 mg; vitamin B<sub>6</sub>, 4.1 mg; vitamin B<sub>12</sub>, 0.04 mg; pantothenic acid, 18 mg; niacin, 29.7 mg; folate, 1.9 mg and biotin, 0.4 mg.

<sup>b</sup> Nutrient levels were calculated values.

Table S2 Primer sequences used for RT-qPCR analysis. (F: forward; R: reverse)

| GenBank | Sequences (5'→3')                                            | Gen Bank No.   |
|---------|--------------------------------------------------------------|----------------|
| β-actin | F: ATGCTTCTAGGCGGACTGT<br>R: CCATCCAACCGACTGCT               | AY550069       |
| Nrf2    | F: CCAATTCAGCCAGCACAACACATC<br>R: GACTGAGCCTGGTTAGGAGCAATG   | XM_013984303.2 |
| keap1   | F: AGGCTATGATGGTCACACATTCTTGG<br>R: CAATCTGCTTCCGACAGGGTTCC  | NM_001114671.1 |
| NQO1    | F: AGGCTTTGAAGAGGAGAGGATGGG<br>R: CCTTTCTGGAGATGACGGGATTGAAG | NM_001159613.1 |
| HO-1    | F: CCAGGTCTCAAGAAGATTGCTCAG<br>R: GGGTCATCTCCAGAGTGTCATTCG   | NM_001004027.1 |
| GCLC    | F: AGTTCAACACGGTGGAGGACAATATG<br>R: CGGGCAGCCTAATCTGGGAAATG  | XM_021098556.1 |
| GCLM    | F: TGTGATGCCGCCGATTTAACTG<br>R: CCACTCATGTGCCTCGATGTCAG      | XM_001926378.4 |
| SOD1    | F: CTCTCGGGAGACCATTCCATCATTG<br>R: TTCTTCATTTCCACCTCTGCCCAAG | NM_001190422.1 |
| CAT     | F: AGCCTACGTCCTGAGTCTCTGC<br>R: TCCATATCCGTTTCATGTGCCTGTG    | NM_214301.2    |
| GST     | F: CGGCATCAAGTCATCAACATCAACC<br>R: AGAACTGGCACCAGACCTGAGG    | NM_214050.2    |
| GPX1    | F: GCGTCGCTCTGAGGCACAAC<br>R: GGTCGGACGTAATTGAGGCAATTC       | NM_214201.1    |

Table S3 Primer sequences used for RT-qPCR analysis. (F: forward; R: reverse)

| GenBank        | Sequences (5'→3')                                                | Gen Bank No.   |
|----------------|------------------------------------------------------------------|----------------|
| PGC-1 $\alpha$ | F: ATGGAGCAATAAAGCGAAGAGCATTTG<br>R: GAGGAGGGTCATCATTTGTGGTCAG   | NM_213963.2    |
| Nrf1           | F: CGATGCTTCAGAATTGCCAACTACAG<br>R: GCGTTGTCTGGATGGTCATCTCAC     | XM_021078997.1 |
| TFAM           | F: AAATTGCTGAGCTGTGGAGGGAAC<br>R: TACACCTGCCAGTCTGCCCTATAAG      | NM_001130211.1 |
| VDAC1          | F: TCAGAAGGTGAACAAGAAGTTGGAGAC<br>R: CGATCTGGTACTTGGCTGCTATTCC   | NM_213960.1    |
| Cyt C          | F: CGAGTGGTGGCTTGCTGTTGAG<br>R: GGCACTGGGCACACTTCTGAAC           | NM_001129970.1 |
| Mfn1           | F: TGGACTTTATCCGAAACCAGATGAACC<br>R: AACCTTATTTGCCACCTCCTCTGTAAC | NM_001315732.1 |
| Mfn2           | F: CCACACCACCAACTGCTTCCTG<br>R: TCTTGACGCTCCTCTTCTCCTCTG         | XM_021095369.1 |
| OPA1           | F: ACAGAGGATGGTGCTTGTTGACTTAC<br>R: ACACAGTATGATGGCGTTGGGATTC    | XM_021070063.1 |
| Fis1           | F: CAGACAGAGCCACAGAACAACCAG<br>R: CAAGTCCAATGAGTCCAGCCAGTC       | XM_021086263.1 |
| MFF            | F: CAGGTTCCAGAGAGAATTGTCGTAGC<br>R: TTAGTGCCAGAGGTTAAAGGGAGTTG   | NM_001244126.1 |
| Bnip3          | F: GAGGAGGATTACATGGAGAGGAGGAG<br>R: TCGGGTGCTTGAAGAGGAGGAAC      | XM_003359404.4 |
| PINK1          | F: GGCGGTGATTGACTACAGCAAGG<br>R: TGGTAACTGCGGCTTCAAGGTG          | XM_021095478.1 |
| p62            | F: CTGCCTGAAGACTATTACACGAGACC<br>R: GAAGATGCTTGTGCCGAGGATAGAG    | NM_001244307.1 |
| LC3I           | F: GCCTTCTCCTGCTGGTGAACC<br>R: GGGAGGCGTAGACCATGTAGAGG           | NM_001170827.1 |
| LC3II          | F: TTCTTCCTGTTAGTGAACGGACATAGC<br>R: ATCCATCTTCATCCTTCTCGCTTTCG  | NM_001190290.1 |
